# Supplementary figures and images for: “Push–push and push–pull” polystannanes
Source: Royal Society of Chemistry journal article supplement (doi:10.1039/c8dt03043j), 2018-01-01

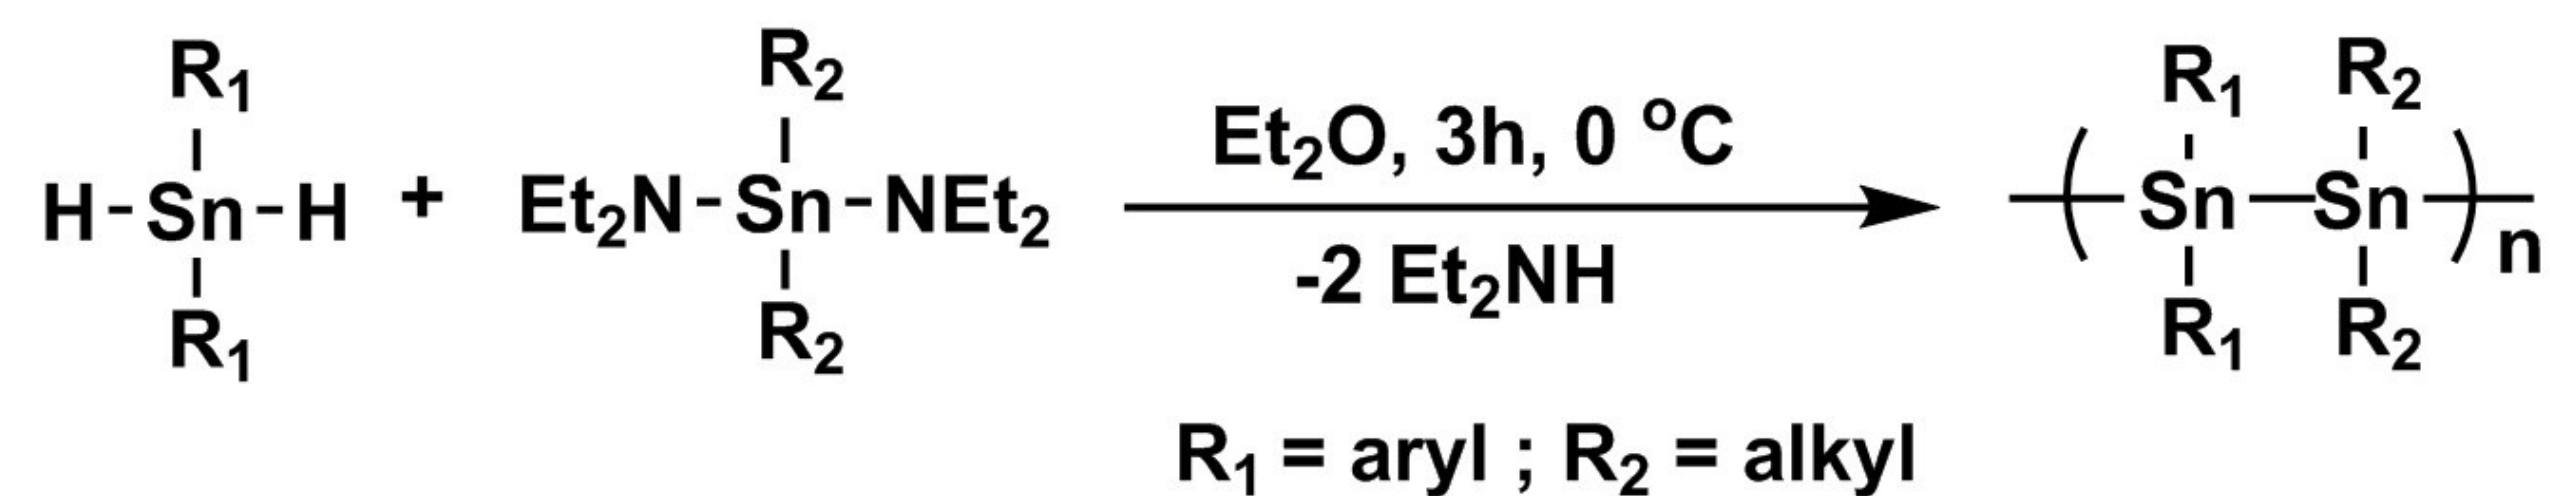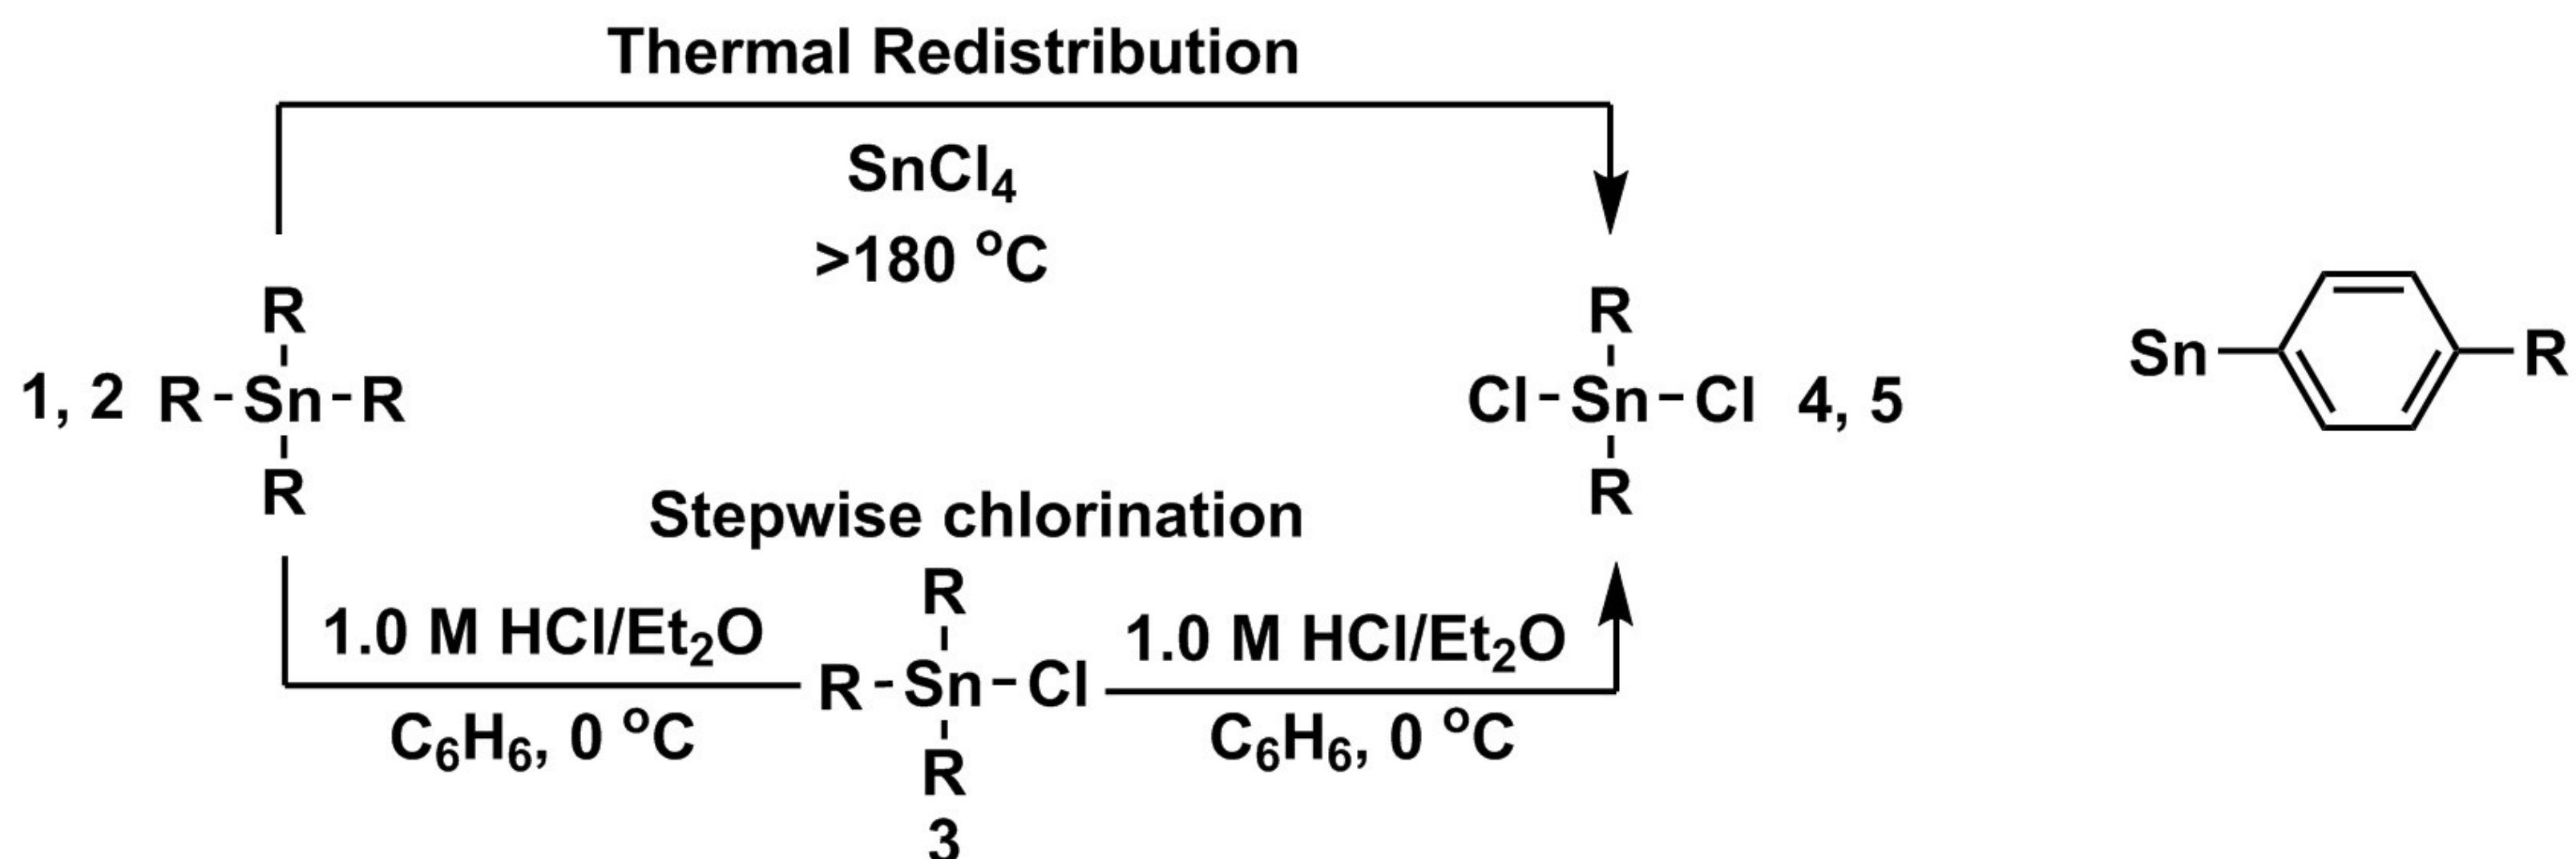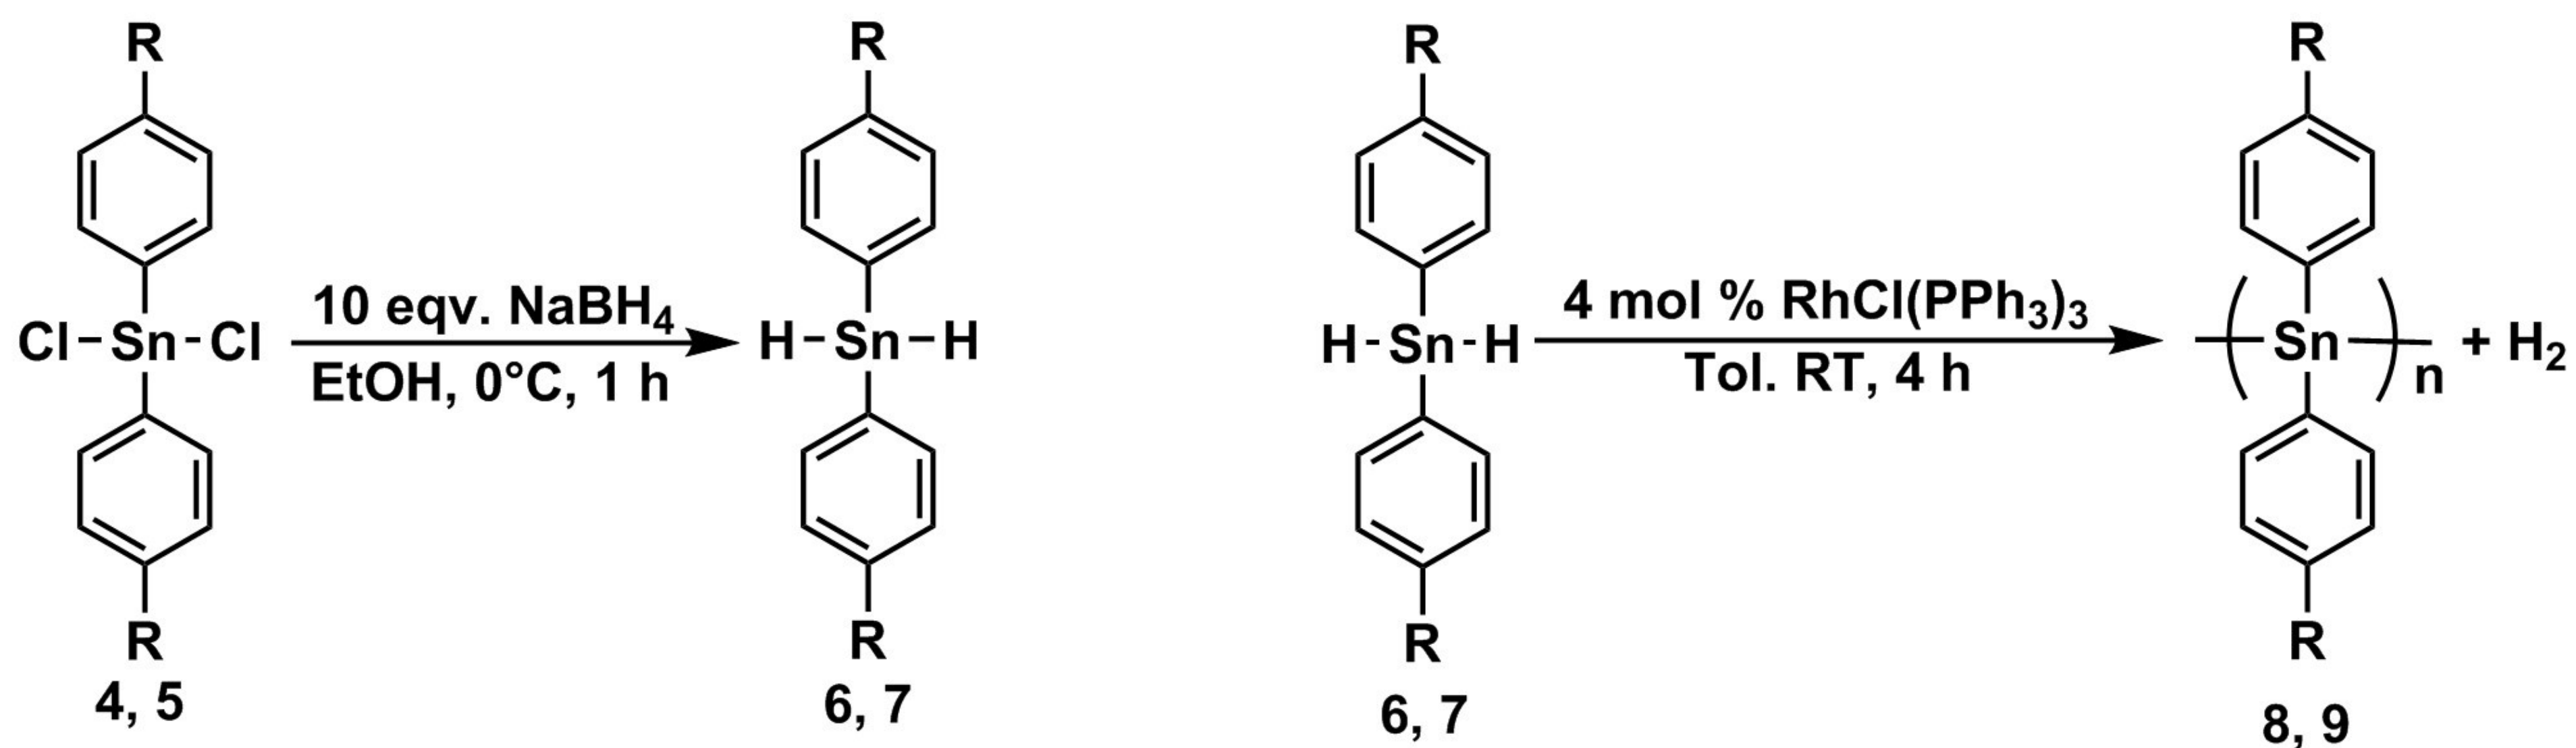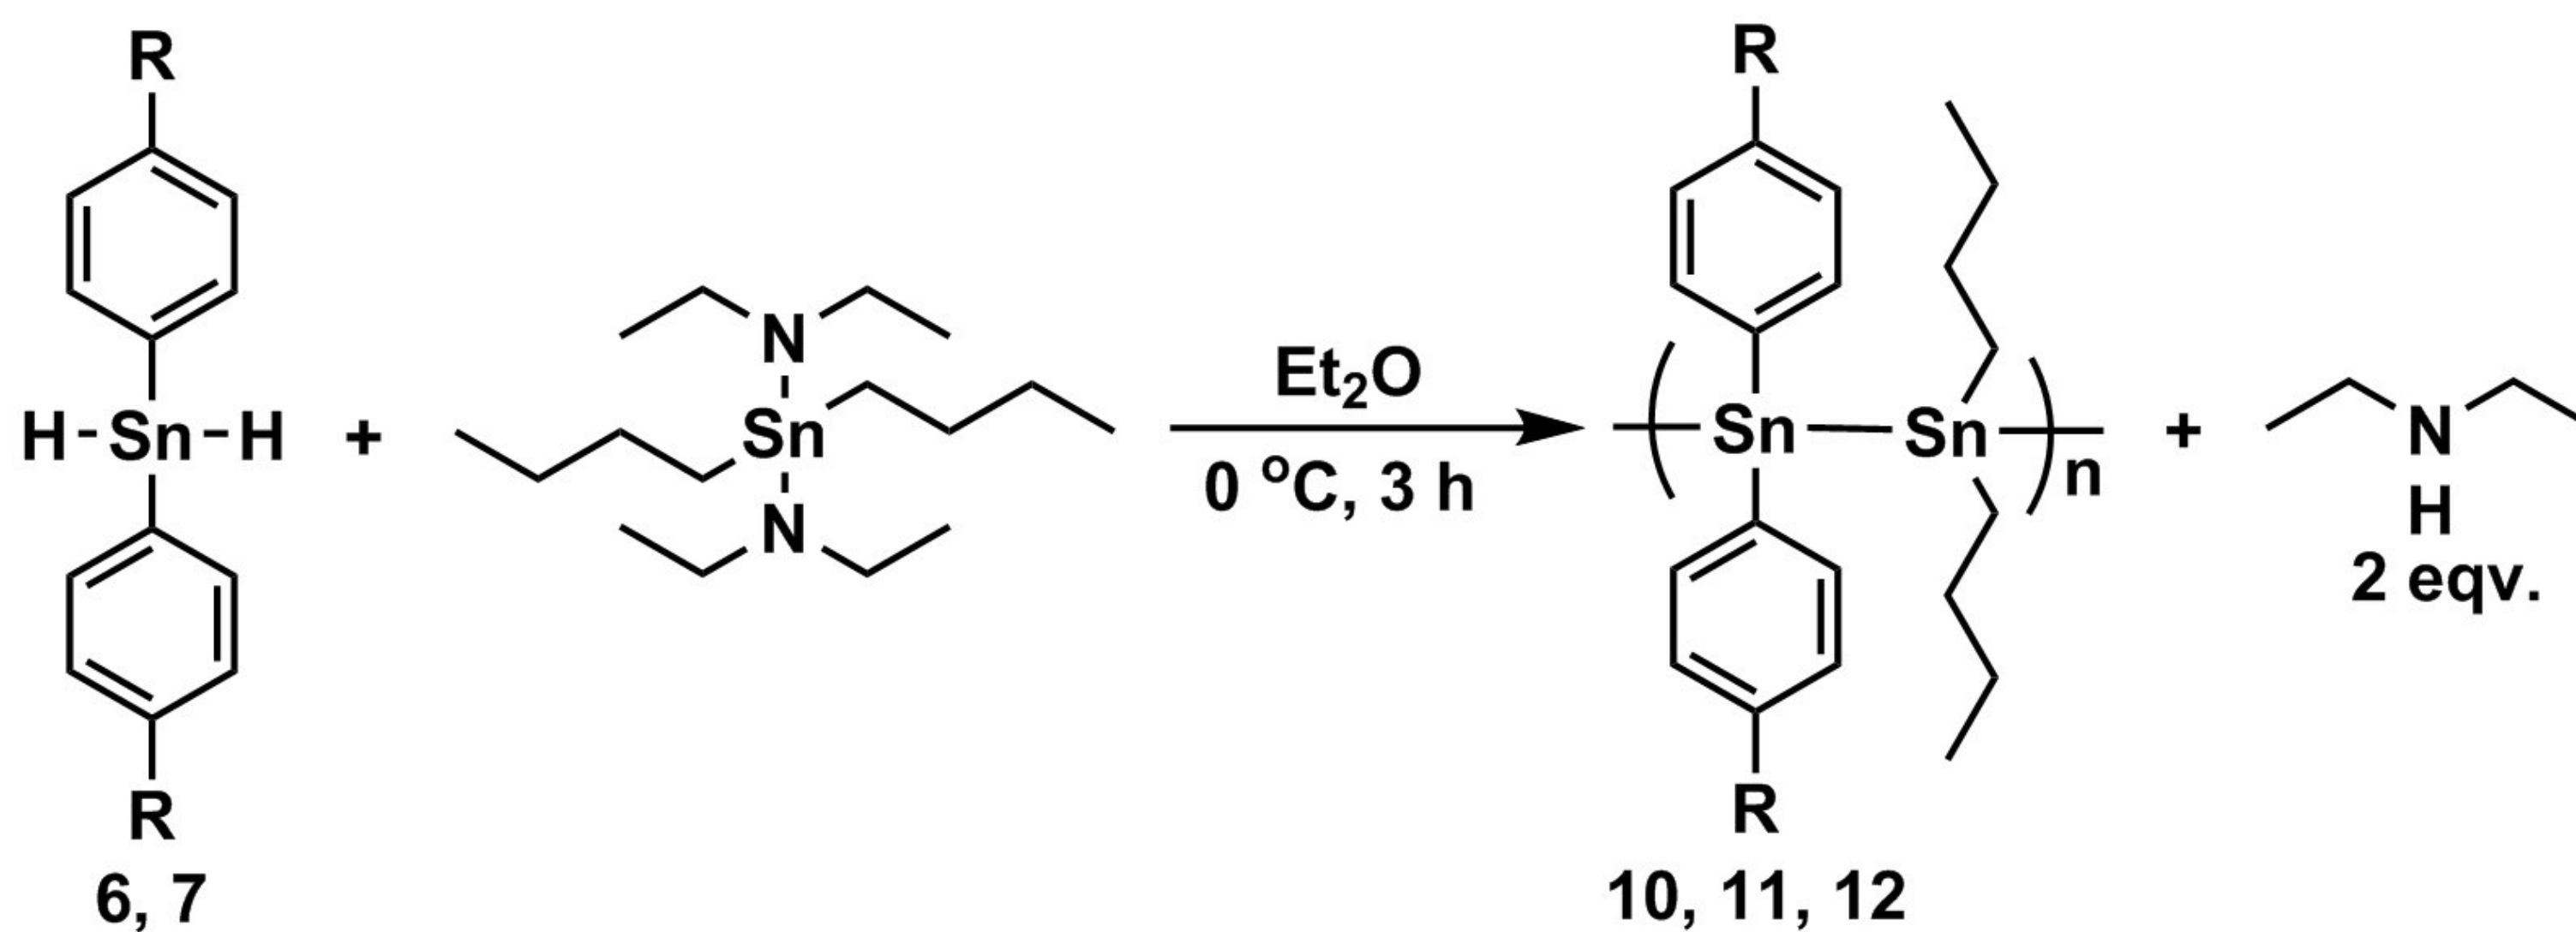

Supplement: c8dt03043j2.pdf [file c8dt03043j2.pdf]
